# Supplementary material
Source: publisher figshare collection journal article supplement (https://frontiersin.figshare.com/ndownloader/files/14991617)
Supplement: Supplementary file [file 14991617]

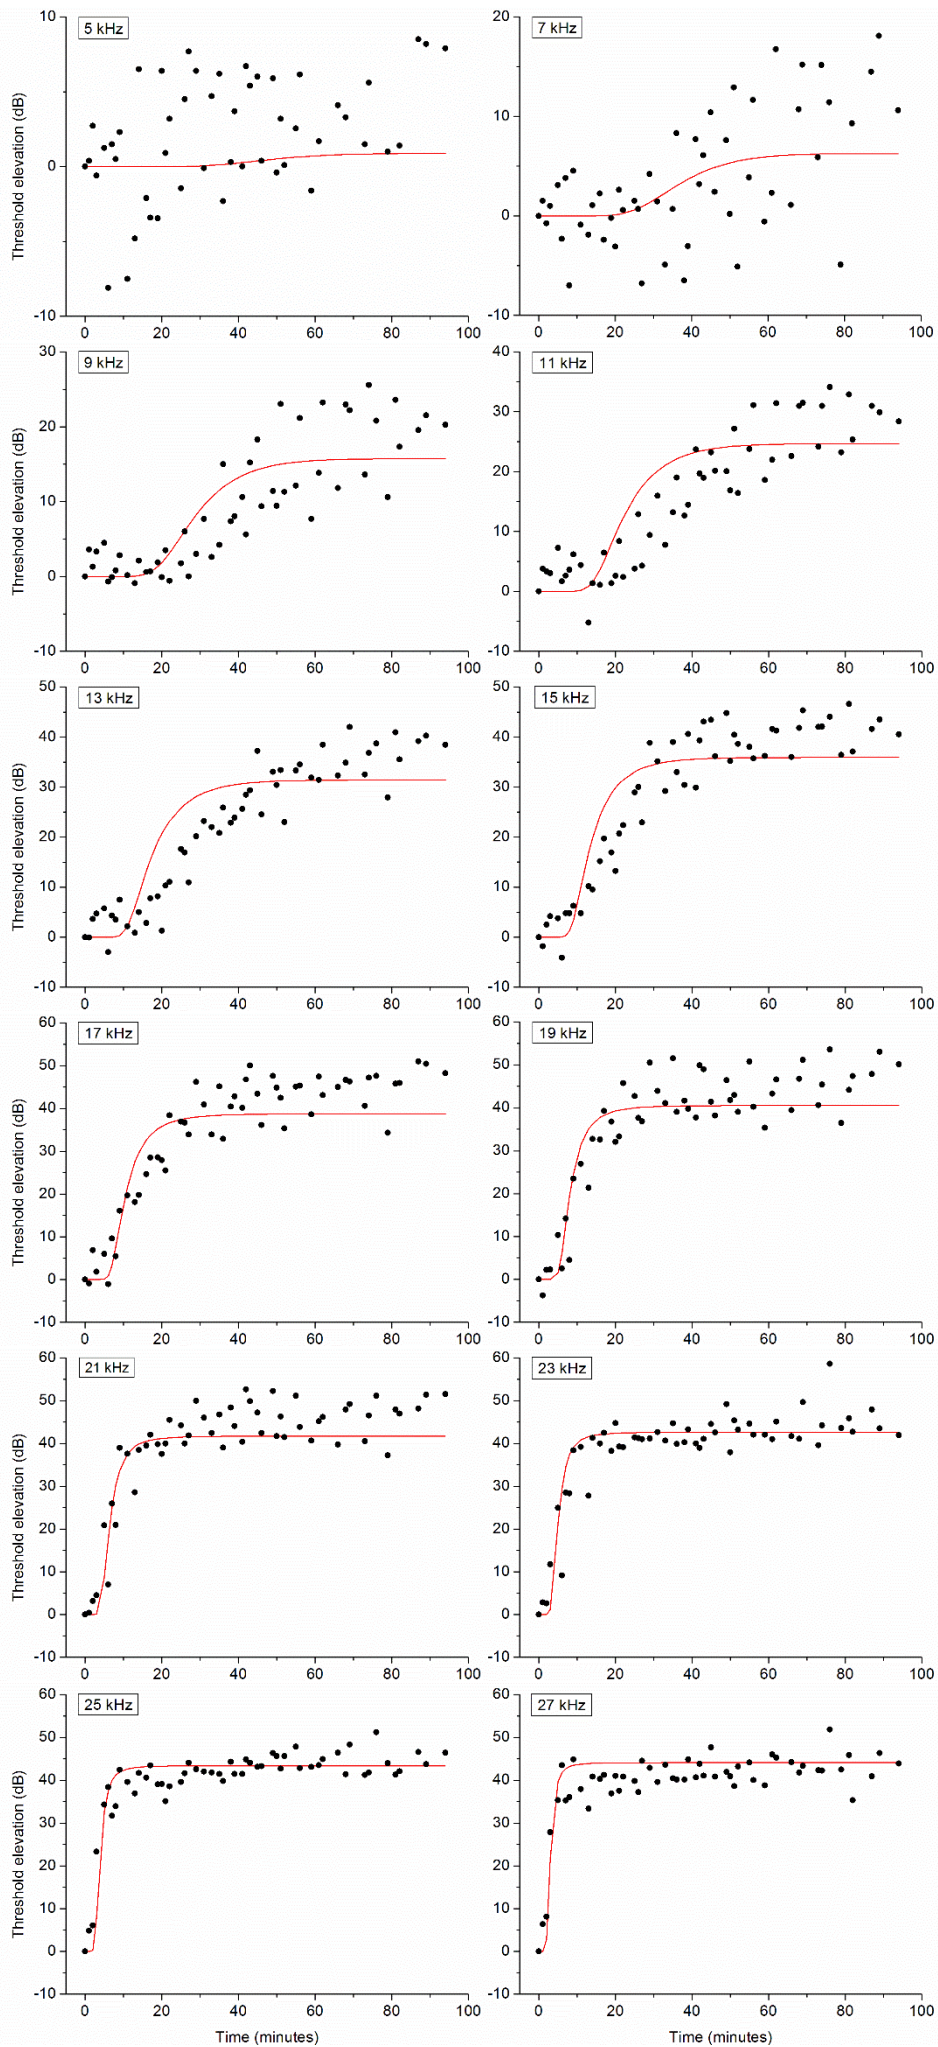

**FIGURE S1.** Pooled data for 5 animals (black circles) showing the CAP threshold elevation after application of 100 mM solution of salicylate to the RW at time = 0. Red curves were fitted to the entire set experimental data using general optimization procedure.
